# Supplementary material
Source: publisher figshare collection journal article supplement (https://acs.figshare.com/ndownloader/files/4350670)

# Ordered Honeycomb Microporous Films from Self-assembly of Alkylated Guanosine Derivatives

## Supporting Information

Yu-Feng Gao, Yan-Jun Huang, Su-Ying Xu, Wen-Juan Ouyang, and Yun-Bao Jiang\*

*Department of Chemistry, College of Chemistry and Chemical Engineering, and the MOE Key  
Laboratory of Analytical Sciences, Xiamen University, Xiamen 361005, China*

ybjjiang@xmu.edu.cn

## CONTENTS

|                                                                      |     |
|----------------------------------------------------------------------|-----|
| Figure S1 and Figure S2.....                                         | S2  |
| Figure S3 and Diffusion NMR experiment.....                          | S3  |
| Diffusion NMR experiment and Table S1.....                           | S4  |
| Figure S4 and Figure S5.....                                         | S5  |
| Figure S6 and Figure S7.....                                         | S6  |
| Modification of silicon surface and Figure S8-10.....                | S7  |
| Figure S11 and Figure S12.....                                       | S8  |
| Figure S13 and Figure S14.....                                       | S9  |
| Figure S15.....                                                      | S10 |
| <sup>1</sup> H NMR and <sup>13</sup> C NMR spectra of <b>1</b> ..... | S11 |
| <sup>1</sup> H NMR and <sup>13</sup> C NMR spectra of <b>2</b> ..... | S12 |
| <sup>1</sup> H NMR and <sup>13</sup> C NMR spectra of <b>3</b> ..... | S13 |
| <sup>1</sup> H NMR and <sup>13</sup> C NMR spectra of <b>4</b> ..... | S14 |

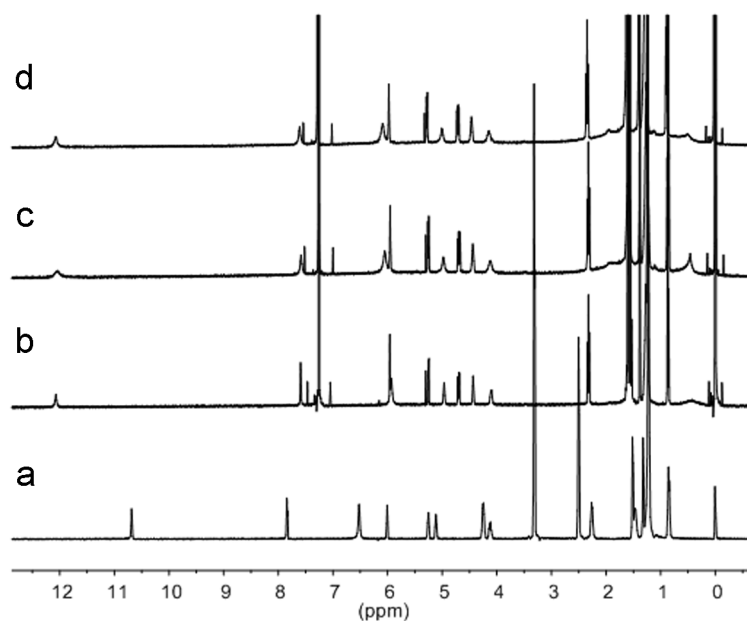

**Figure S1.**  $^1\text{H}$  NMR spectra of **1** at 298 K of (a) 10 mM in  $\text{DMSO}-d_6$  and (b) 1.0, (c) 2.5, and (d) 10 mM in  $\text{CDCl}_3$ .

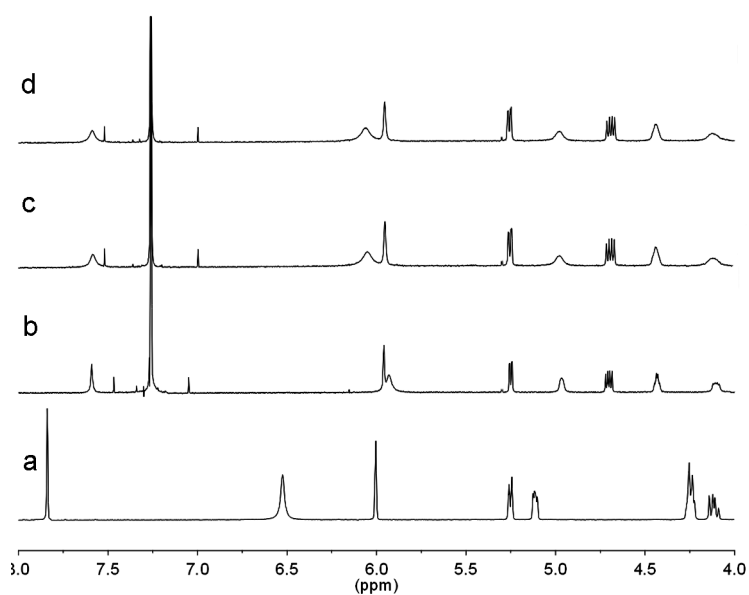

**Figure S2.** Portion of  $^1\text{H}$  NMR spectra of **1** over 4.0-8.0 ppm at concentration of (a) 10 mM in  $\text{DMSO}-d_6$  and (b) 1.0, (c) 2.5, and (d) 10 mM in  $\text{CDCl}_3$  at 298 K.

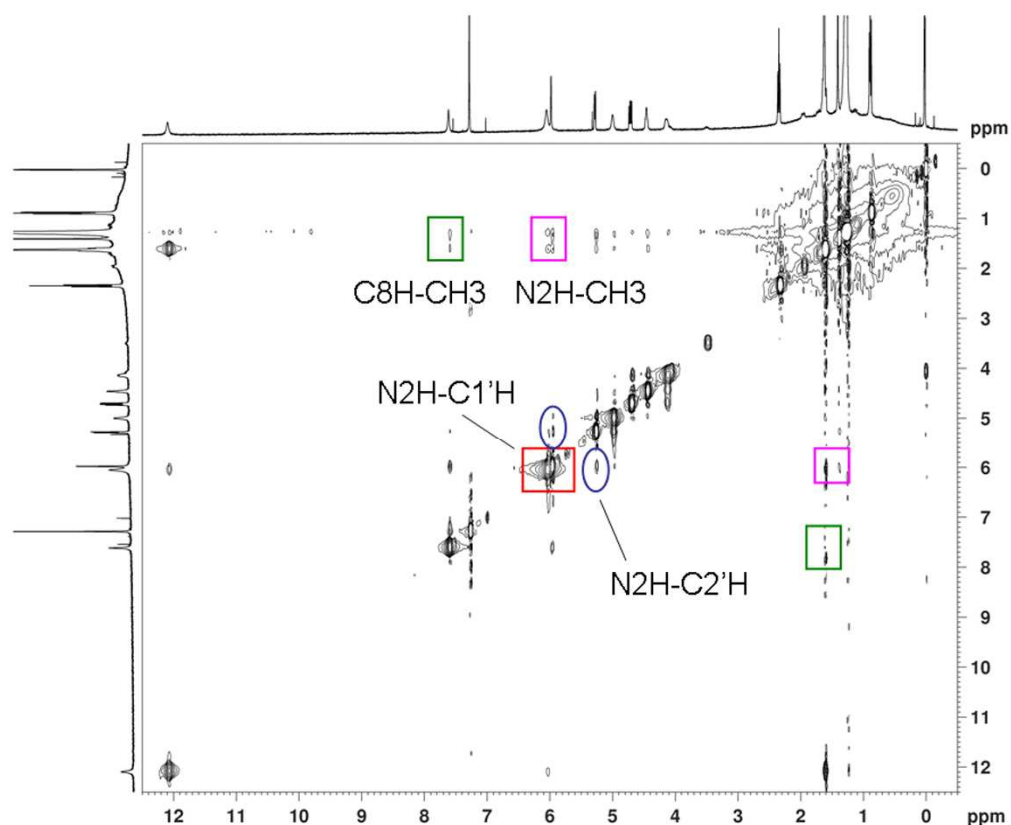

**Figure S3.** NOESY spectrum of 10 mM **1** in CDCl<sub>3</sub> at 298 K.

### Diffusion NMR experiments

Diffusion experiments were carried out with a Bruker AV400 spectrometer, the temperature was actively controlled at  $25.0 \pm 0.5$  °C. Diffusion coefficients were derived using integration of the desired peaks to a single exponential decay, using the T1/T2 Relaxation (Bruker TopSpin v 2.0), according to the equation:

$$I = I_0 \cdot \exp(-D \cdot (2\pi \cdot \gamma \cdot g \cdot \delta)^2 \cdot (\Delta - \delta/3))$$

where  $I$  denotes the NMR signal intensity,  $g$  is the gradient strength,  $\delta$  is the gradient pulse duration,  $\Delta$  is the gradient separation time,  $\gamma$  is the gyromagnetic ratio of the nucleus being observed.<sup>1</sup> Experiments consisted 16 points, and each point comprised 256 scans with  $\delta$  value of 3.6 ms,  $\Delta$  value of 99.9 ms, and  $\gamma$  value of 4258 Hz per G.

Calculation of the hydrodynamic radii in DMSO- $d_6$  was performed using the viscosity value ( $\eta = 2.0 \times 10^{-3}$  Kg m<sup>-1</sup> s<sup>-1</sup>, 298.15 K) provided by the solvent supplier,

in CDCl<sub>3</sub> the viscosity value used was ( $\eta = 0.54 \times 10^{-3} \text{ Kg m}^{-1} \text{ s}^{-1}$ , 298.15 K). The hydrodynamic radii ( $r_H$ ) were calculated according to the spherical approximation using the Einstein-Stokes equation:

$$D = k_B \cdot T / (6\pi \cdot \eta \cdot r_H)$$

where T denotes the temperature,  $\eta$  is the viscosity of the solvent at the given temperature and  $k_B$  is the Boltzmann-Constant.<sup>1</sup> All the measurements were performed in triplicate and the uncertainty is given by the standard deviation.

**Table S1** Diffusion coefficients ( $D_s$ ) and hydrodynamic radii ( $r_H$ ) of the monomer and assemblies formed by **1**, **2**, and **3** determined by PFG-NMR in DMSO-*d*<sub>6</sub> and CDCl<sub>3</sub>.

|                                                    |                                              | <b>1</b>        | <b>2</b>        | <b>3</b>         |
|----------------------------------------------------|----------------------------------------------|-----------------|-----------------|------------------|
| DMSO- <i>d</i> <sub>6</sub> <sup>a</sup><br>2.5 mM | $D_s$<br>( $10^{-10} \text{ m}^2/\text{s}$ ) | $1.92 \pm 0.01$ | $2.04 \pm 0.03$ | $1.70 \pm 0.02$  |
|                                                    | $r_H$ (Å)                                    | $5.68 \pm 0.03$ | $5.35 \pm 0.08$ | $6.42 \pm 0.08$  |
| CDCl <sub>3</sub> <sup>b</sup><br>1.0 mM           | $D_s$<br>( $10^{-10} \text{ m}^2/\text{s}$ ) | $4.73 \pm 0.02$ |                 |                  |
|                                                    | $r_H$ (Å)                                    | $8.54 \pm 0.04$ |                 |                  |
| CDCl <sub>3</sub> <sup>c</sup><br>10 mM            | $D_s$<br>( $10^{-10} \text{ m}^2/\text{s}$ ) | $4.29 \pm 0.03$ | $4.33 \pm 0.03$ | $3.64 \pm 0.05$  |
|                                                    | $r_H$ (Å)                                    | $9.42 \pm 0.07$ | $9.33 \pm 0.06$ | $11.10 \pm 0.15$ |

(a)  $D_s$  values were obtained by the analysis of N2-H signals of **1**, **2**, and **3** at 6.53, 6.54, and 6.54 ppm, respectively. (b)  $D_s$  value was obtained by the analysis of C1'-H signals of **1** at 5.96 ppm. (c)  $D_s$  values were obtained by the analysis of C1'-H signals of **1**, **2**, and **3** at 5.96, 5.95, and 5.95 ppm, respectively

#### Reference:

[1] (a) Y. Cohen, L. Avram, L. Frish, *Angew. Chem. Int. Ed.* 2005, **44**, 520–554; (b) M. S. Kaucher, Y. F. Lam, S. Pieraccini, G. Gottarelli, J. T. Davis, *Chem. Eur. J.* 2004, **11**, 164–173.

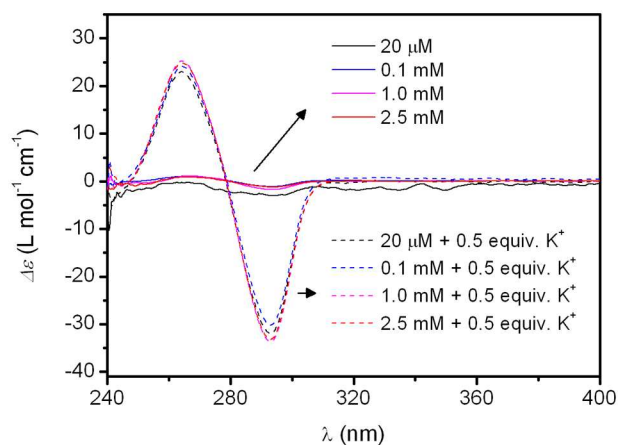

**Figure S4.** CD spectra of **1** in  $\text{CHCl}_3$  (solid lines) at 20  $\mu\text{M}$ , 0.1 mM, 1.0 mM and 2.5 mM, respectively in the absence (solid lines) and presence (dashed line) of 0.5 equiv  $\text{K}^+$ .

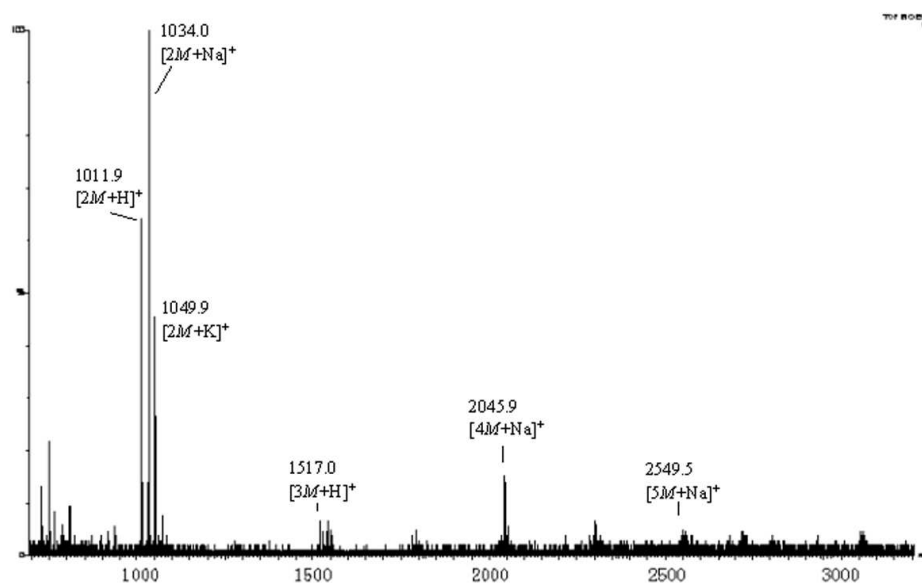

**Figure S5.** ESI-MS of **1** in  $\text{CHCl}_3$ .

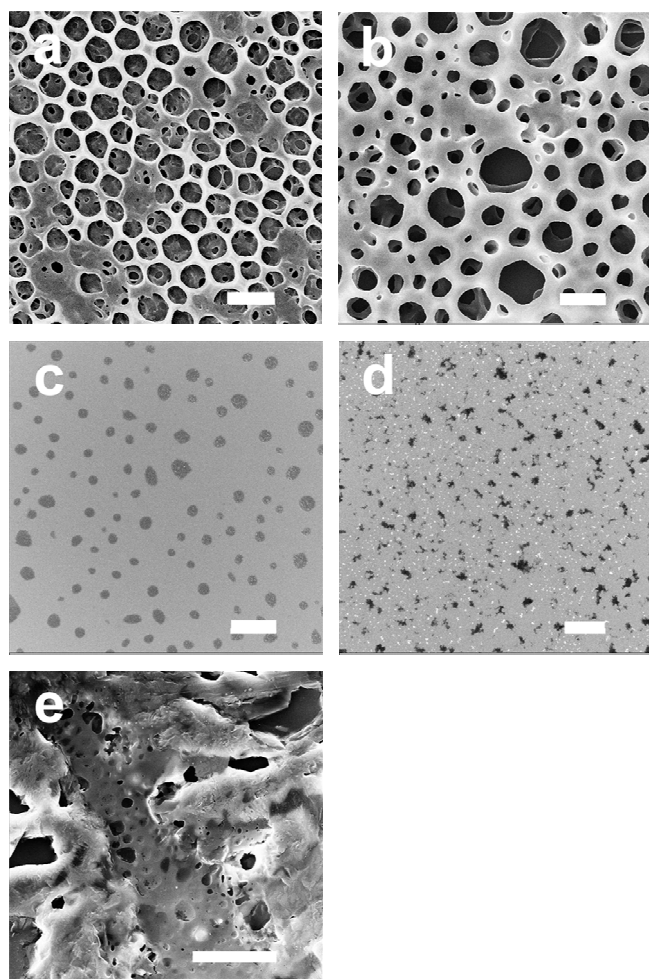

**Figure S6.** SEM images of films made from different molecules in  $\text{CHCl}_3$  at  $80\text{ }^\circ\text{C}$ : (a) **2** (1.0 mM), (b) **3** (1.0 mM), (c) **4** (1.0 mM), (d) the mixture of **1** (0.5 mM) and **4** (0.5 mM), (e) **1** (0.5 mM) and 0.25 equiv KSCN. The scale bars are  $2\text{ }\mu\text{m}$  (a, b),  $20\text{ }\mu\text{m}$  (c, e),  $10\text{ }\mu\text{m}$  (d), respectively.

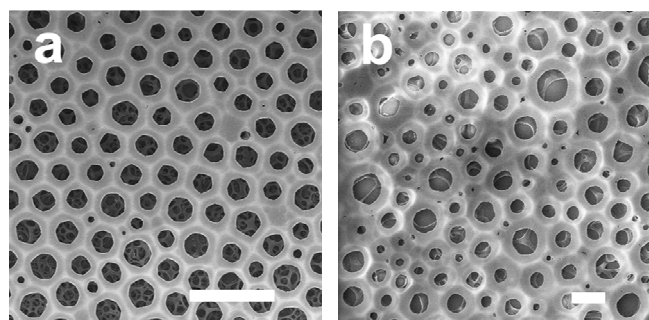

**Figure S7.** SEM images of honeycomb films made from  $0.5\text{ mM}$  **1** in  $\text{CHCl}_3$  at  $80\text{ }^\circ\text{C}$  on (a) gold-coated silicon and (b) glass. The scale bars are  $10\text{ }\mu\text{m}$  (a) and  $2\text{ }\mu\text{m}$  (b), respectively.

## Modification of silicon surface

Modification of silicon surface was accorded to reference 2, 3. The used n-type Si (100) wafers were cleaned previously using acetone, ethanol, and deionized water three times, respectively. The cleaned Si wafers were oxidized by O<sub>2</sub>-plasma to make the surface more hydrophilic.<sup>2,3</sup> Then the oxidized Si wafers were coating with fluoroalkylsilane compound (**F<sub>13</sub>-OMCS**, Figure S8, Aldrich product) by chemical vapour deposition (CVD) method to make the surface hydrophobic.<sup>2,3</sup> The contact angles of the modified silicon surface were showed in Figure S9.

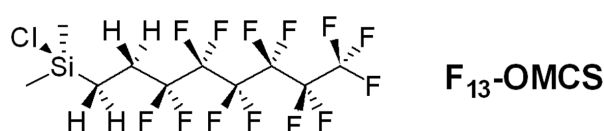

**Figure S8.** Molecular structure of **F<sub>13</sub>-OMCS**.

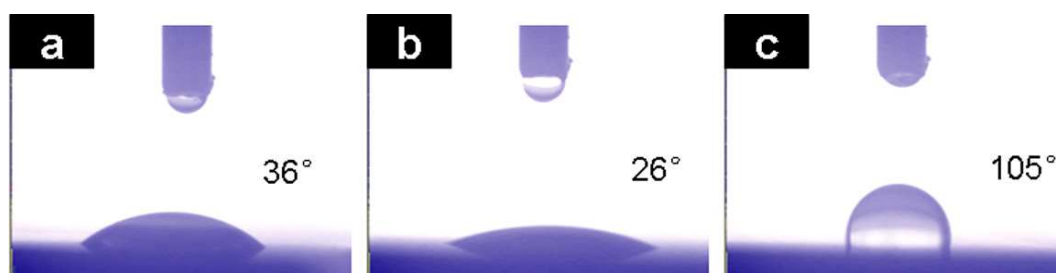

**Figure S9.** Photographs of water droplets on the different silicon surface: (a) cleaned Si wafer, (b) O<sub>2</sub>-plasma treated Si wafer, (c) fluoroalkylsilane coated Si wafer.

## References:

- [2] A. Hozumi, K. Ushiyama, H. Sugimura, O. Takai, *Langmuir* 1999, **15**, 7600-7604.
- [3] H. Schiff, S. Saxer, S. Park, C. Padeste, J. Gobrecht, *Nanotechnology* 2005, **16**, S171-S175.

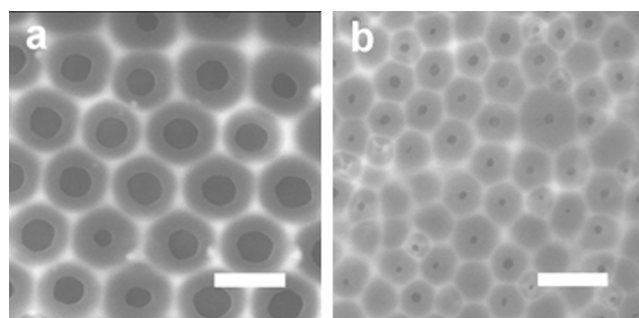

**Figure S10.** SEM images of honeycomb films made from 0.5 mM **1** in CHCl<sub>3</sub> at 80 °C on (a) O<sub>2</sub>-plasma treated silicon and (b) fluoroalkylsilane coated silicon. The scale bars are 2 (a) and 5 μm (b), respectively.

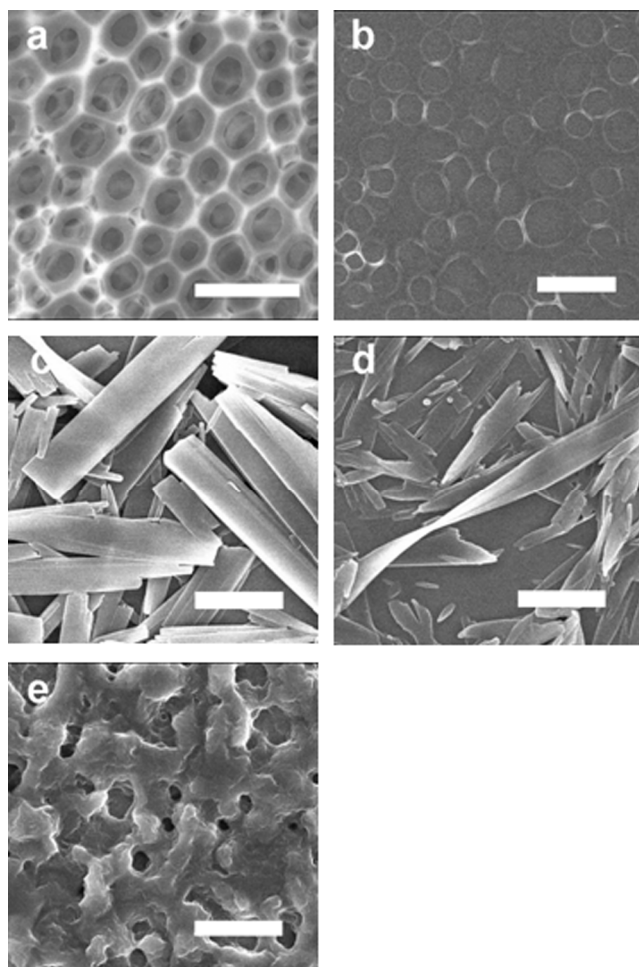

**Figure S11.** SEM images of microstructures made from 0.5 mM **1** at 80 °C in various solvents: (a) CH<sub>2</sub>Cl<sub>2</sub>, (b) ethyl acetate, (c) benzene, (d) toluene, and (e) 1,4-dioxane. The scan bars are 5  $\mu$ m (a, c-d), and 15  $\mu$ m (b), respectively.

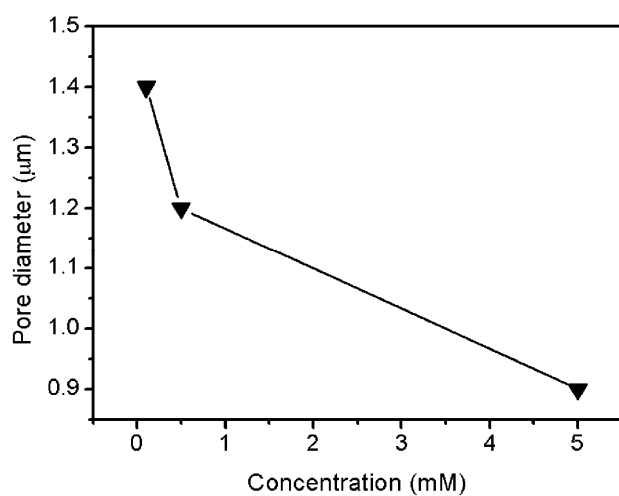

**Figure S12.** Plot of pore diameter versus concentration of **1** in CHCl<sub>3</sub>.



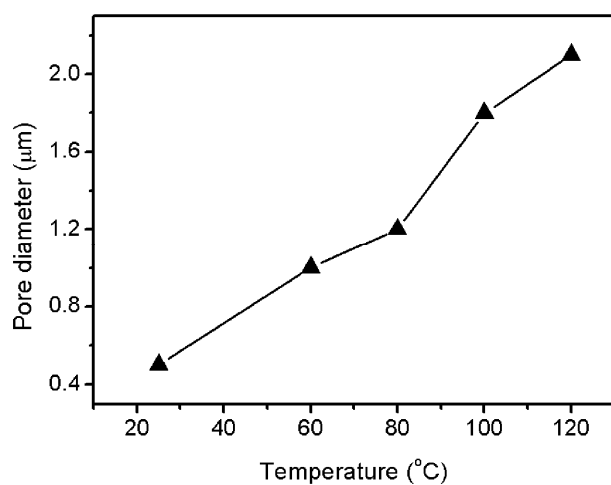

**Figure S13.** Plot of pore diameter versus temperature.

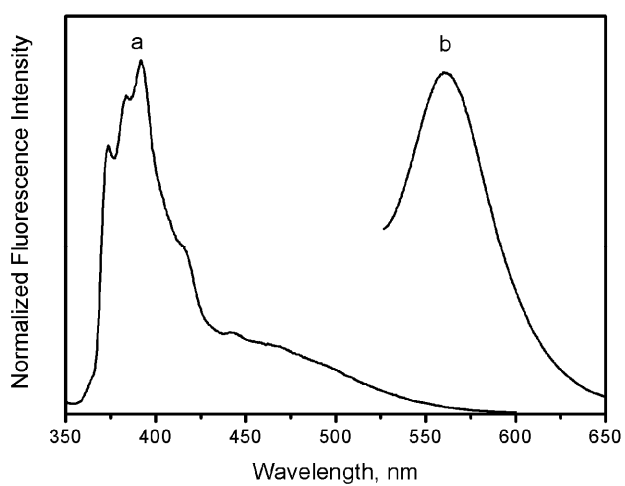

**Figure S14.** Fluorescence spectra of the honeycomb films made from 0.5 mM **1** at 80 °C, containing 0.01 equivalents of pyrene (a) and rhodamine 6G (b). Excitation wavelengths were 345 nm (a) and 490 nm (b), respectively.

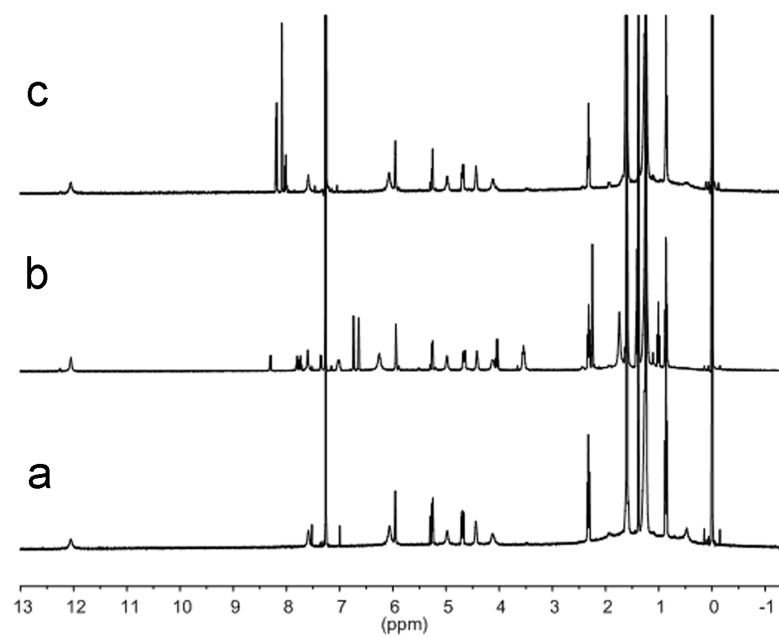

**Figure S15.**  $^1\text{H}$  NMR spectra of **1** at 298 K of 10 mM in  $\text{CDCl}_3$  (a) and in  $\text{CDCl}_3$  containing 0.2 equivalents of rhodamine 6G (b) or pyrene (c).

$^1\text{H}$  NMR and  $^{13}\text{C}$  NMR spectra of **1**, **2**, **3** and **4**.

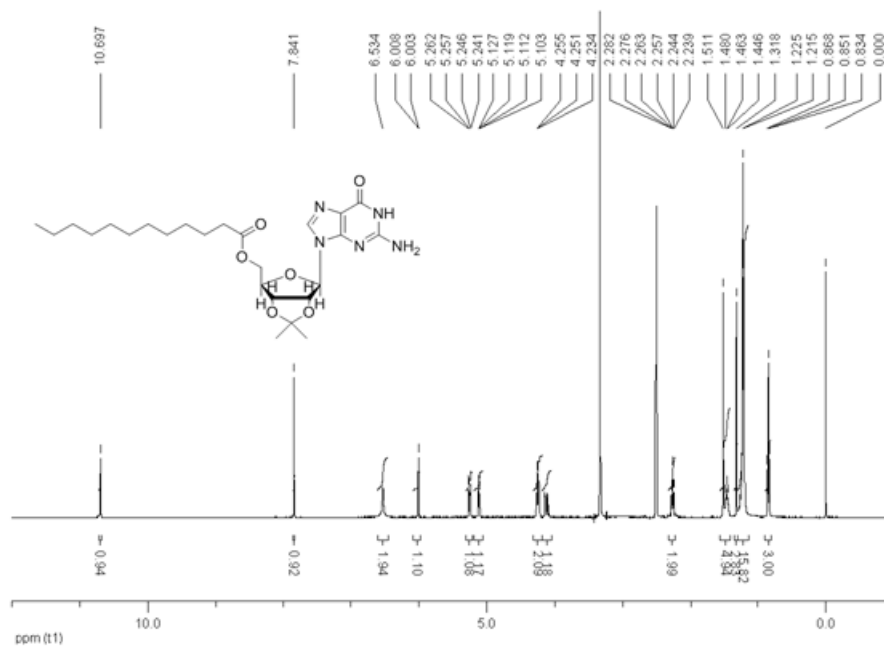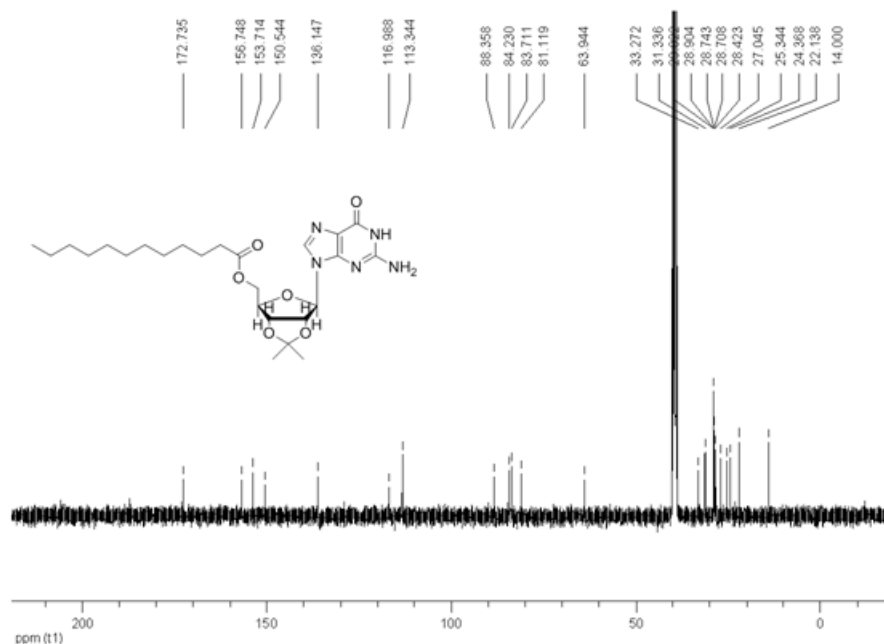

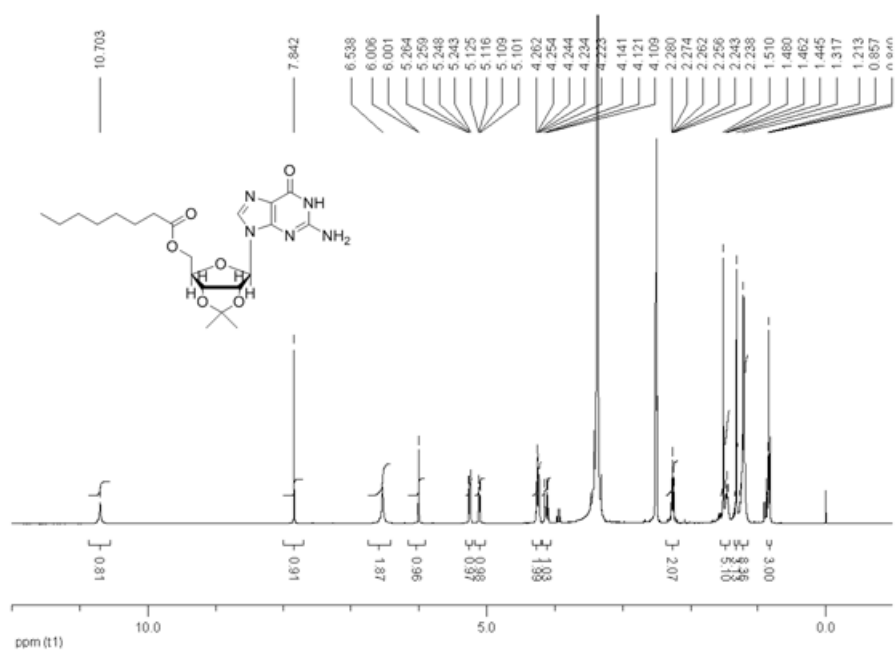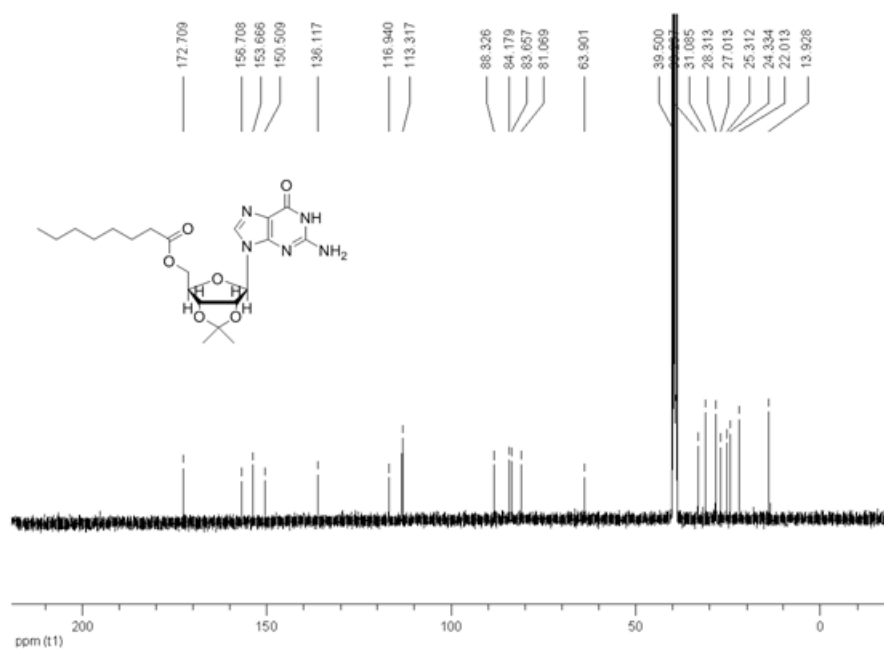

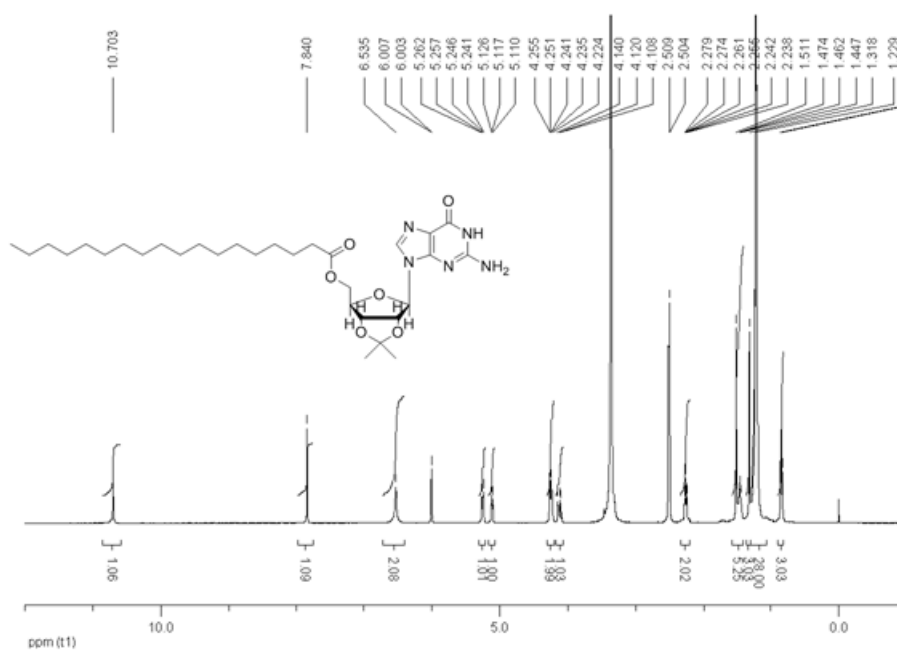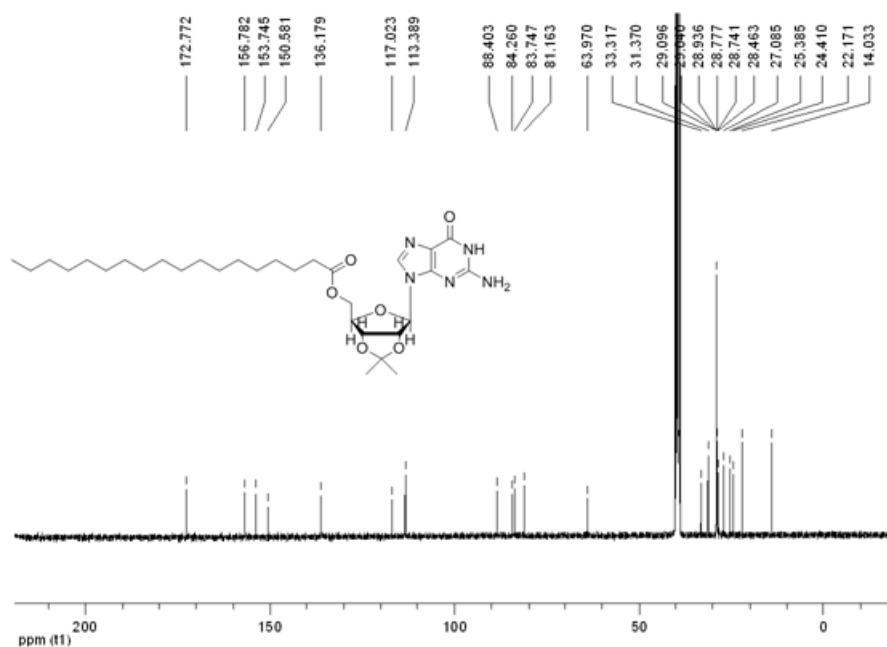

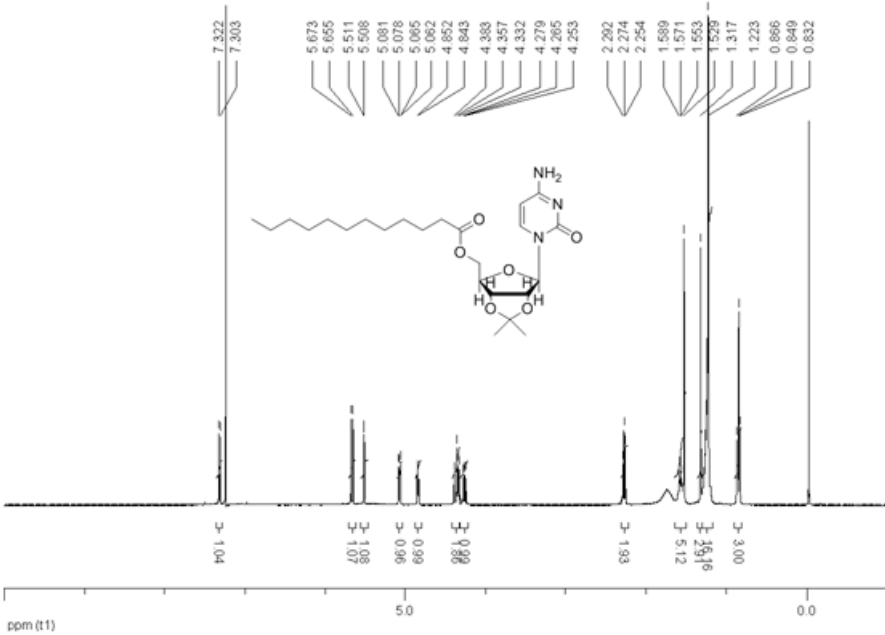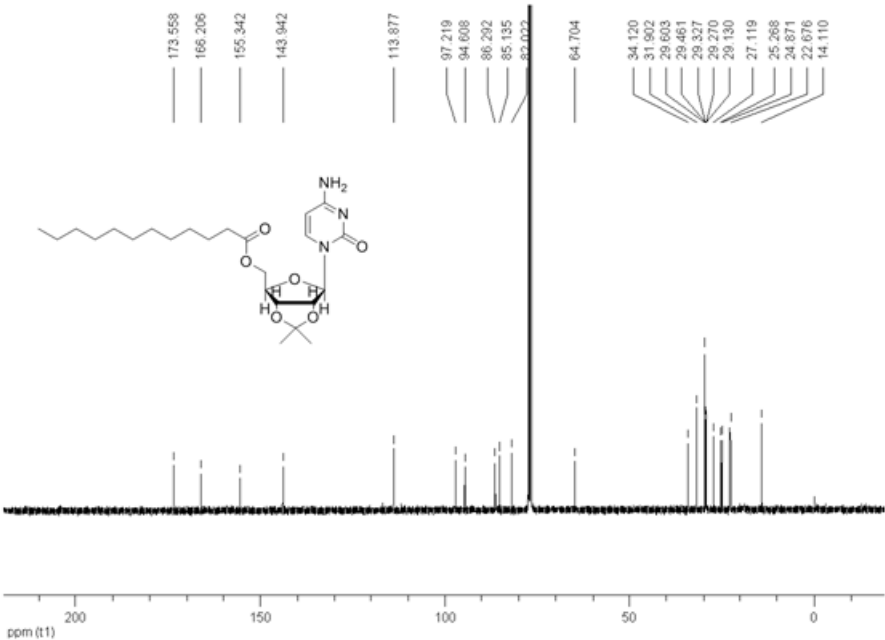

Supplement: Supplementary file 1 [file 4350670]
